# Supplementary material for: Pharmacology, Toxicology, and Rational Application of Cinnabar, Realgar, and Their Formulations
Source: Hindawi journal article supplement (doi:10.1155/2022/6369150), 2022-09-27

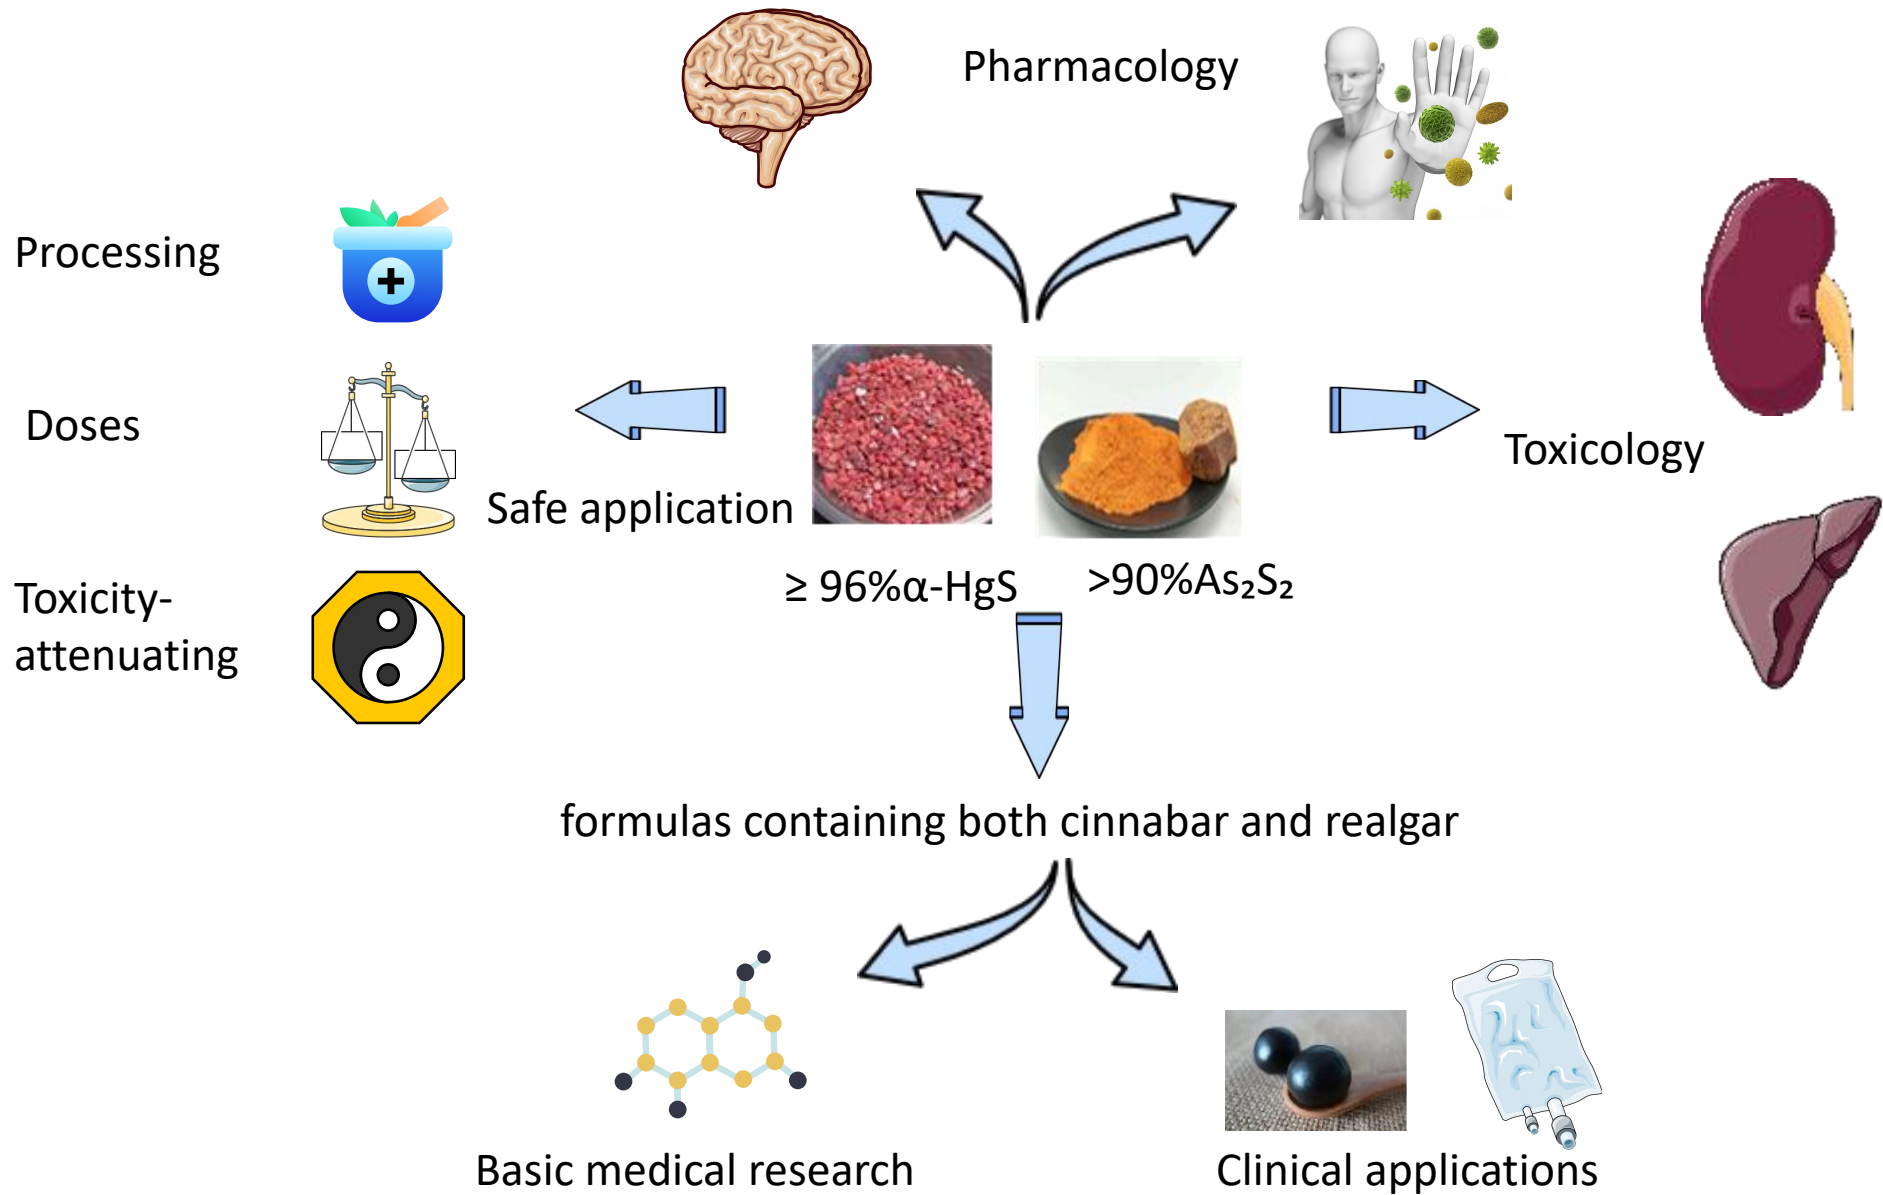

Supplement: f1 [file 6369150.f1.pdf]
